# Supplementary material for: Reduced CD146 expression promotes tumorigenesis and cancer stemness in colorectal cancer through activating Wnt/β-catenin signaling
Source: PubMed Central journal article supplement (PMC5130037; doi:10.18632/oncotarget.9930), 2016-06-09
Supplement: oncotarget-07-40704-s001.pdf [file oncotarget-07-40704-s001.pdf]

## Reduced CD146 expression promotes tumorigenesis and cancer stemness in colorectal cancer through activating Wnt/ $\beta$ -catenin signaling

### SUPPLEMENTARY FIGURES AND TABLES

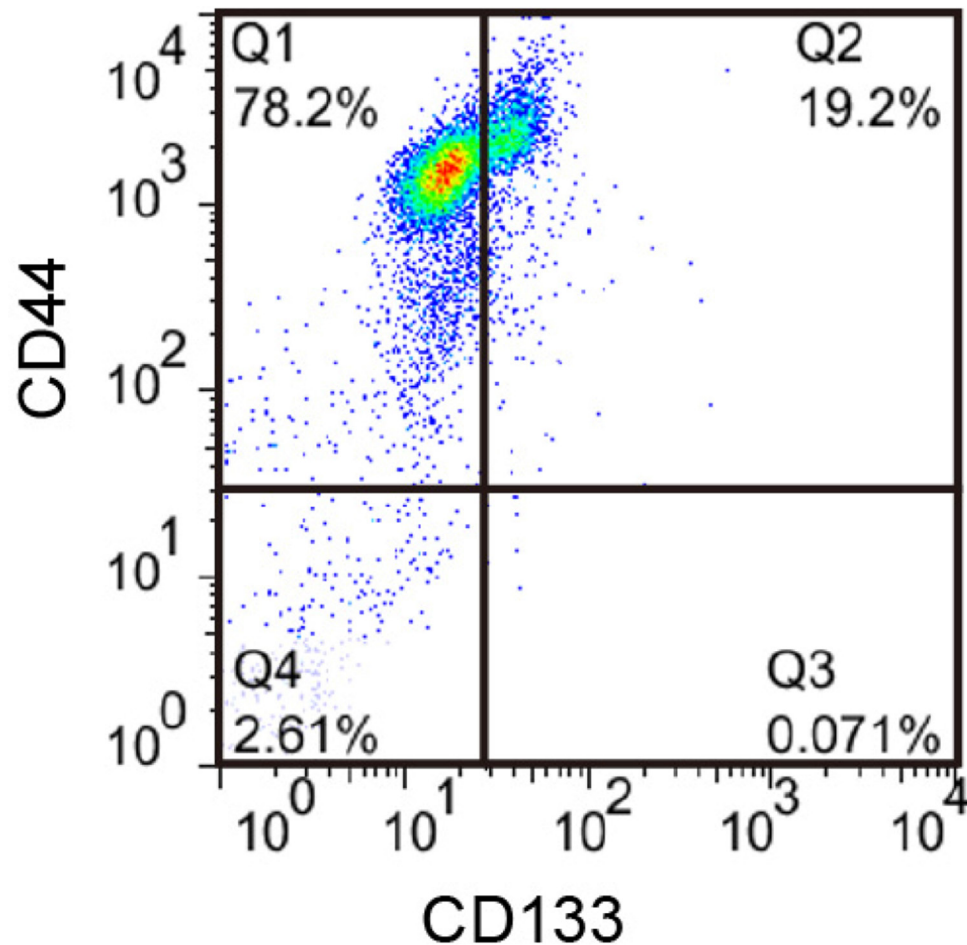

**Supplementary Figure S1: Phenotypic identification of primary CRC cell line P6C.** FACS analysis of CD44 and CD133 expression on P6C cells.

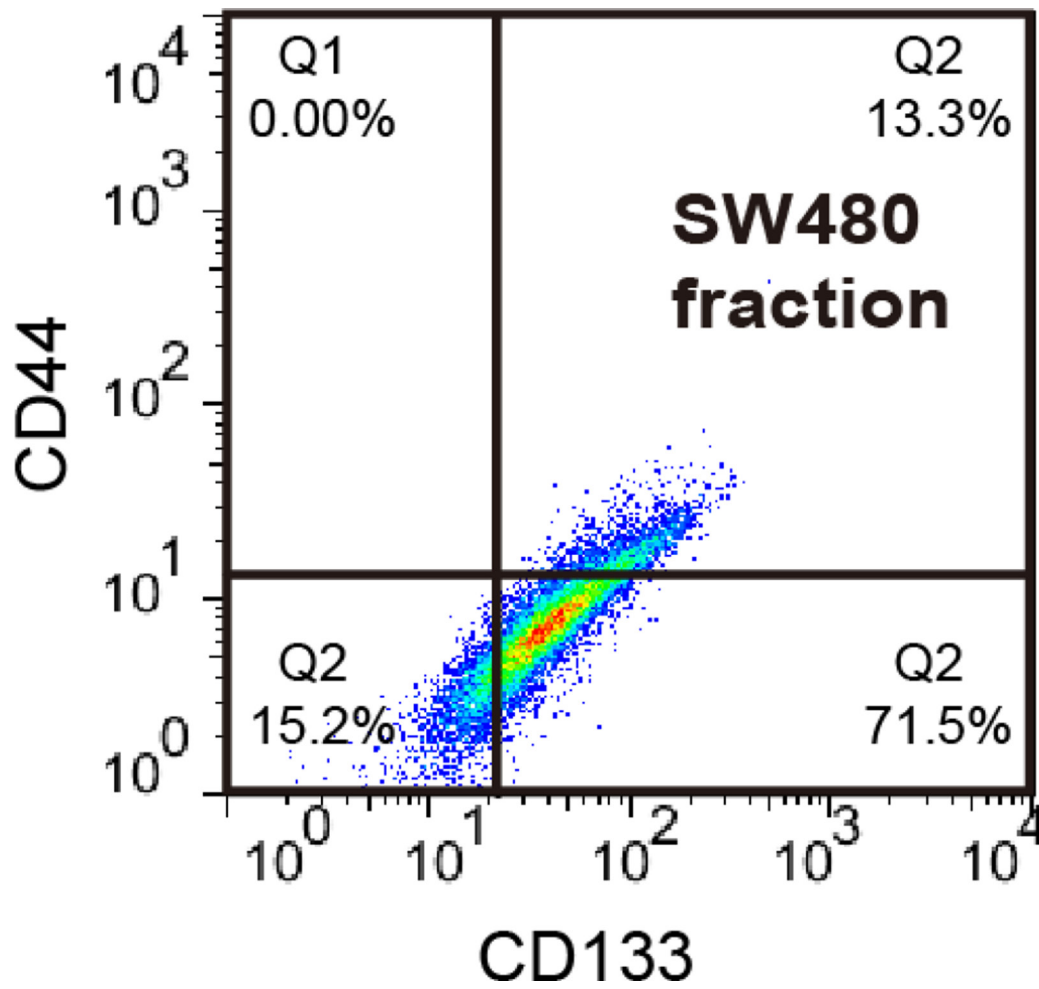

Supplementary Figure S2: FACS sorting of SW480 fraction based on the expression of CD44 and CD133. SW480 fraction denotes the CD44<sup>+</sup>CD133<sup>+</sup> subset in established CRC cell line SW480.

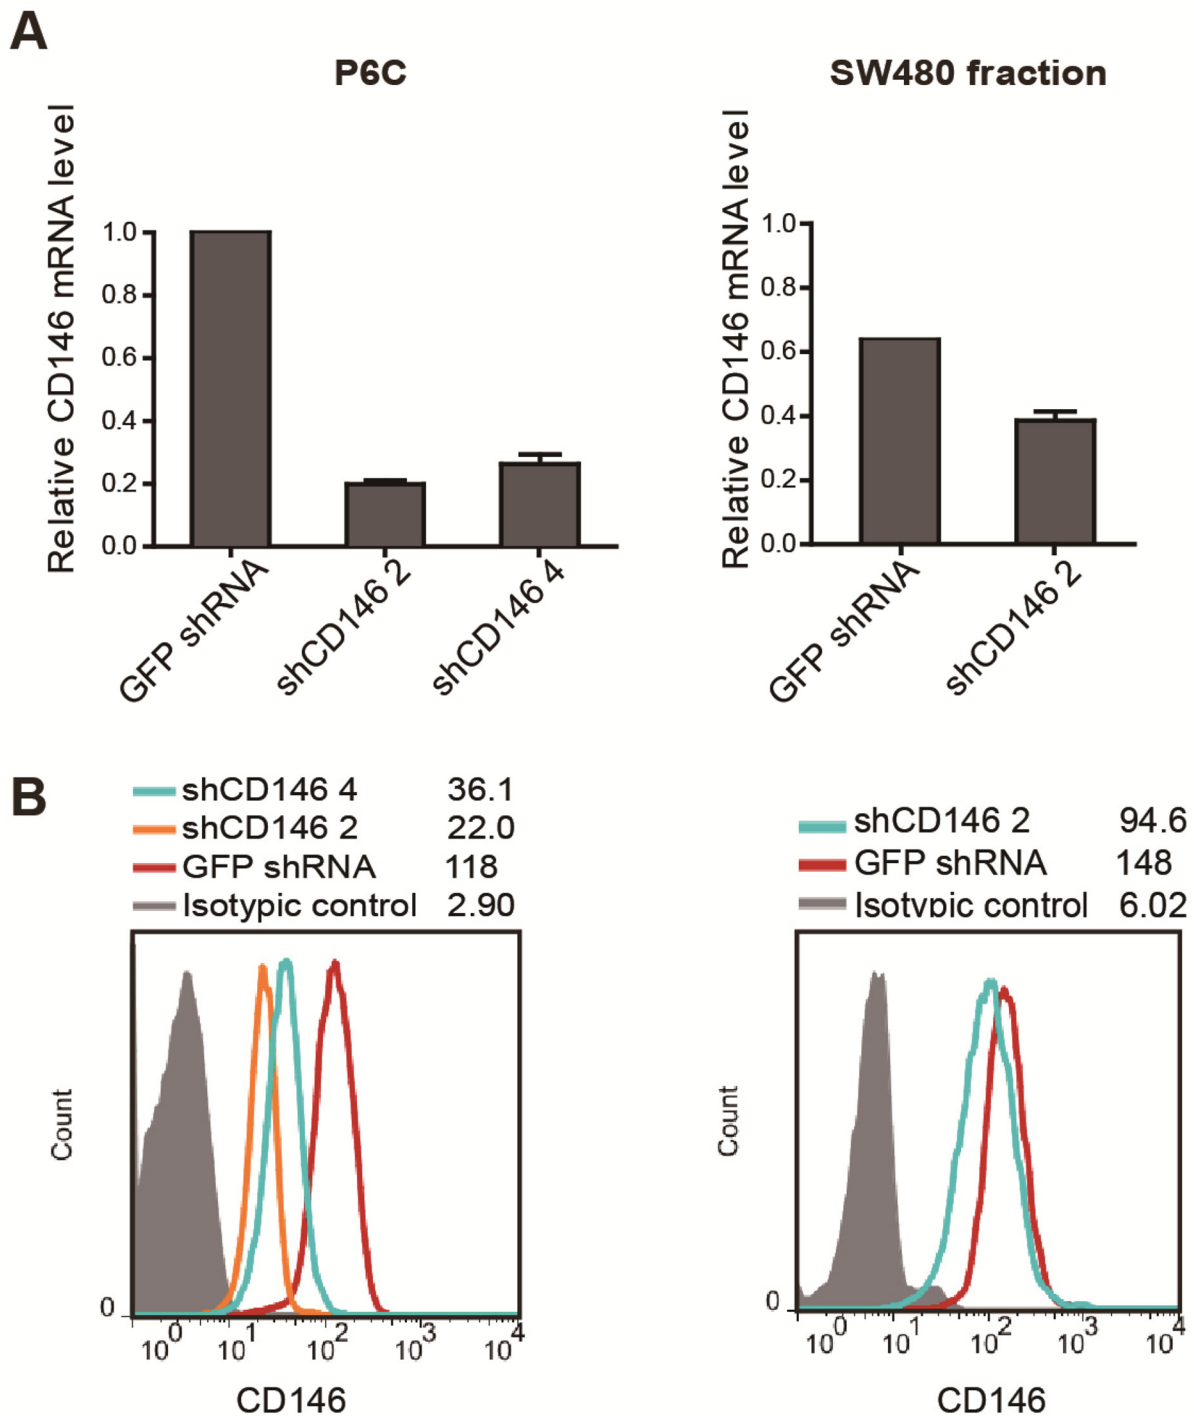

**Supplementary Figure S3: Knockdown efficiency of CD146 in P6C and SW480 fraction with shRNAs transfection.**

**A.** The mRNA expression levels of CD146 in P6C cells and SW480 fraction, as assessed by qRT-PCR analysis. GFP shRNA was used as a negative control. The relative mRNA level of CD146 was normalized to human GAPDH mRNA expression. Error bars, mean  $\pm$  s.d.

**B.** The protein levels of CD146 in P6C cells (left) and SW480 fraction (right) were analyzed by FACS. Histograms of one representative experiment are shown.

**A**

|    | Cell subset | Incidence | Latency |
|----|-------------|-----------|---------|
| 1° | GFP shRNA   | 2/5       | 32      |
|    | shCD146 2   | 4/5       | 19      |
| 2° | GFP shRNA   | 1/5       | 45      |
|    | shCD146 2   | 2/5       | 23      |

Notes: 1 000 single cells were injected .

**B**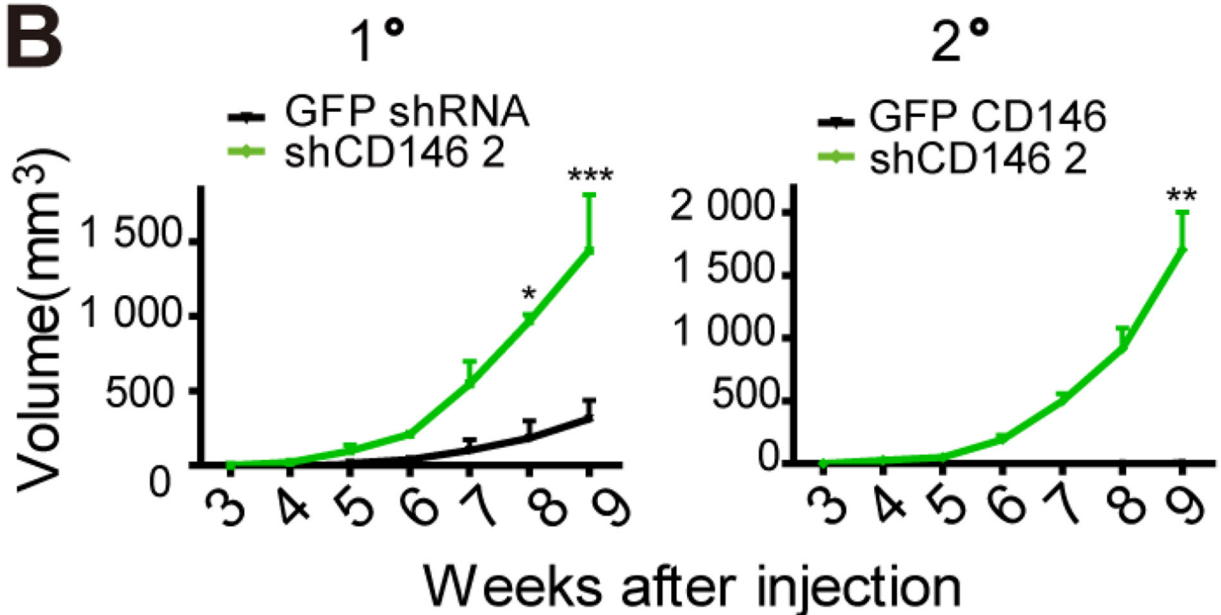

**Supplementary Figure S4: Reduced CD146 expression promotes colorectal tumorigenesis *in vivo*.** A. Reduced expression of CD146 facilitates tumor formation in serial transplantations. 1000 SW480 fraction cells were used for each injection (n=5). B. Tumor volumes and growth curves were monitored in serial recipients. Significance of differences at indicate time point were determined by two-way ANOVA analysis, \* $P < 0.05$ , \*\* $P < 0.01$ , \*\*\* $P < 0.001$ . Error bars, mean  $\pm$  s.d.

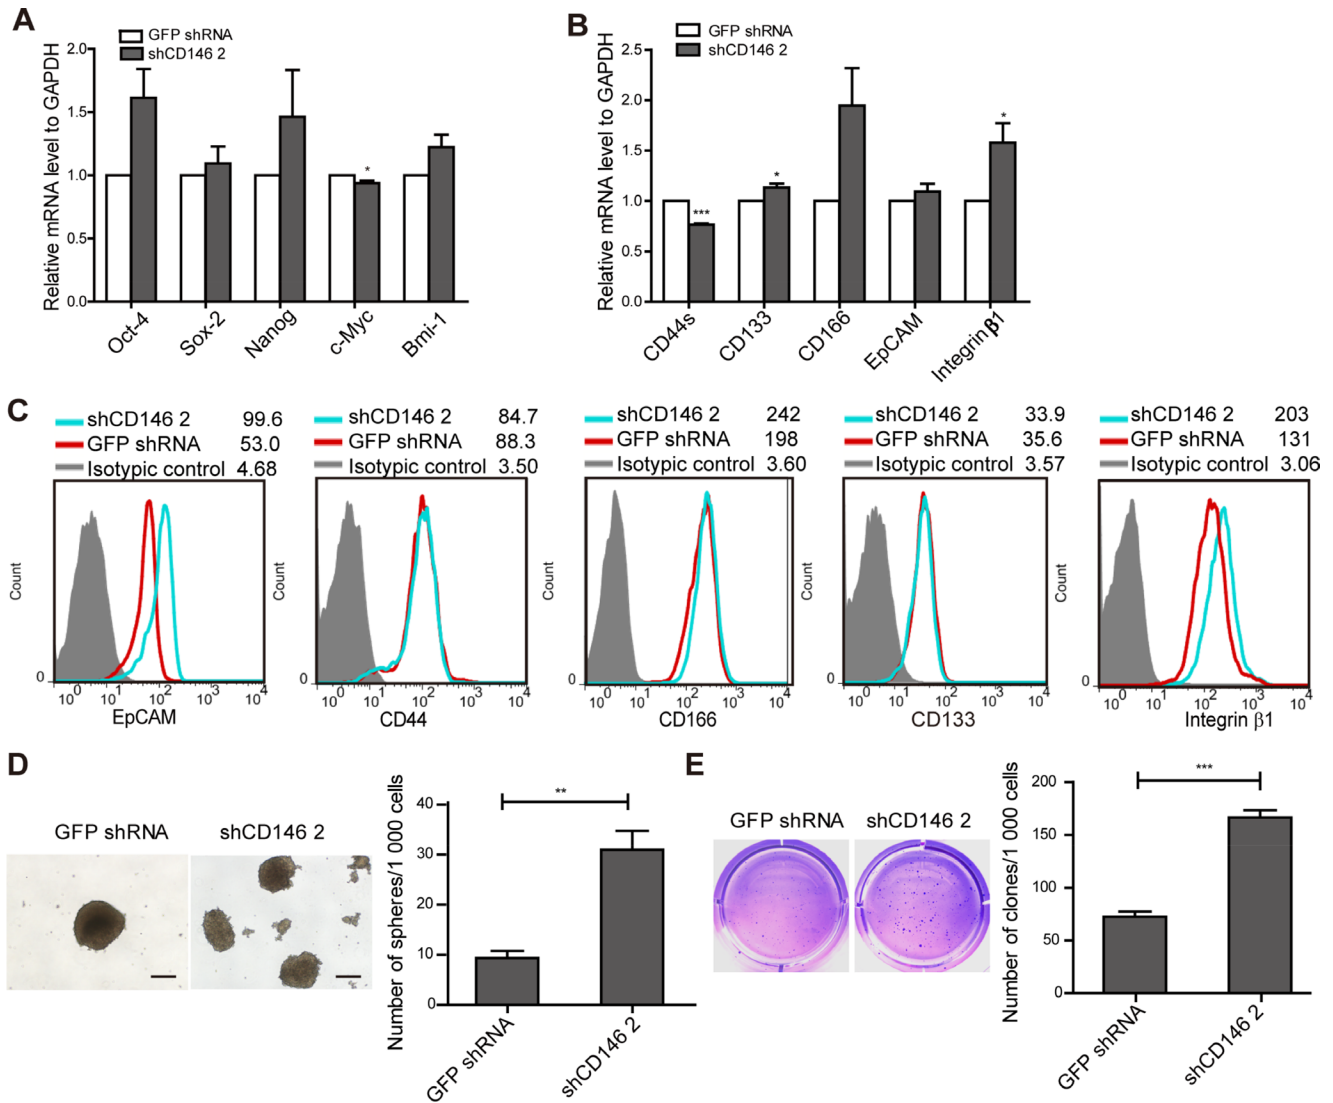

**Supplementary Figure S5: Knockdown of CD146 in SW480 fraction restores a stem cell phenotype.** **A.** The mRNA expression levels of stemness-related transcription factors in SW480 fraction, as determined by qRT-PCR. Data were expressed as mean value  $\pm$  s.d. of three independent experiments. **B.** The mRNA expression levels of colorectal CSC markers in SW480 fraction. **C.** FACS analysis of CSC surface markers. **D.** CD146 knockdown promotes sphere formation. 1000 SW480 fraction cells were cultured in ultra low adherent plates in triplicates under SFM condition. **E.** CD146 knockdown increases clone formation efficiency. \* $P < 0.05$ , \*\* $P < 0.01$ , \*\*\* $P < 0.001$ . Error bars, mean  $\pm$  s.d.

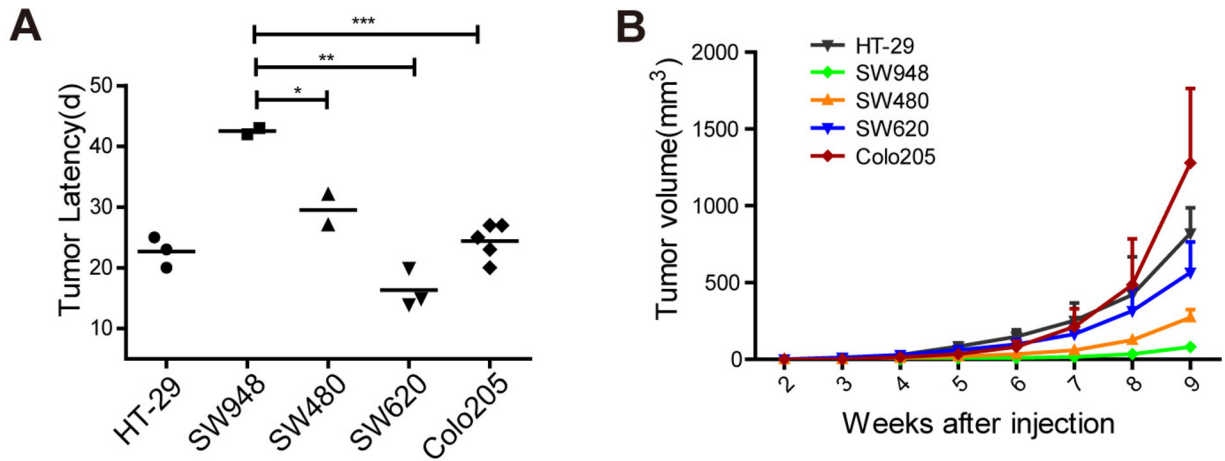

**Supplementary Figure S6: Tumorigenicity of five established human CRC cell lines *in vivo*.** **A.** Tumor incidence and latency in xenotransplantation. 1000 cells were used for each subcutaneous injection to NOD/SCID mice (n=5). **B.** Tumor volumes and growth curves were monitored and measured weekly. \* $P < 0.05$ , \*\* $P < 0.01$ , \*\*\* $P < 0.001$ . Error bars, mean  $\pm$  s.d.

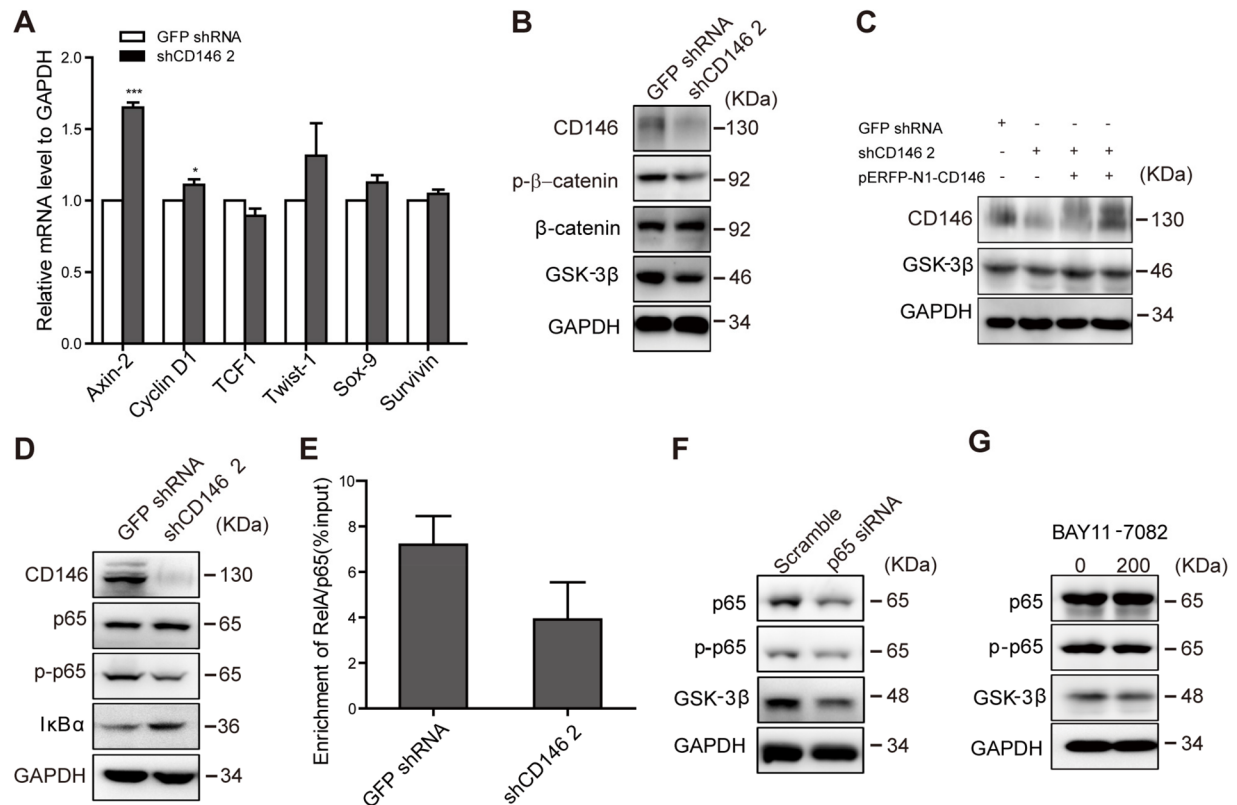

**Supplementary Figure S7: Knockdown of CD146 activates canonical Wnt signaling in SW480 fraction cells.** **A.** The mRNA expression levels of Wnt target genes upon CD146 knockdown. Data were expressed as mean value  $\pm$  s.d. of three independent experiments. **B.** Knockdown of CD146 represses  $\beta$ -catenin phosphorylation and GSK-3 $\beta$  expression. GAPDH were used as a loading control. **C.** Rescued CD146 expression up-regulates the protein level of GSK-3 $\beta$ . **D.** Knockdown of CD146 inhibits NF- $\kappa$ B/p65 signaling pathway. **E.** Binding of NF- $\kappa$ B/p65 to the predicted site in GSK-3 $\beta$  gene promoter was validated by ChIP assays. NF- $\kappa$ B/p65 enrichment was normalized to input control. **F-G.** GSK-3 $\beta$  expression was inhibited by both transfection of p65-specific siRNA and treatment with NF- $\kappa$ B inhibitor BAY11-7082 (200 ng/ml). \* $P < 0.05$ , \*\*\* $P < 0.001$ . Error bars, mean  $\pm$  s.d.

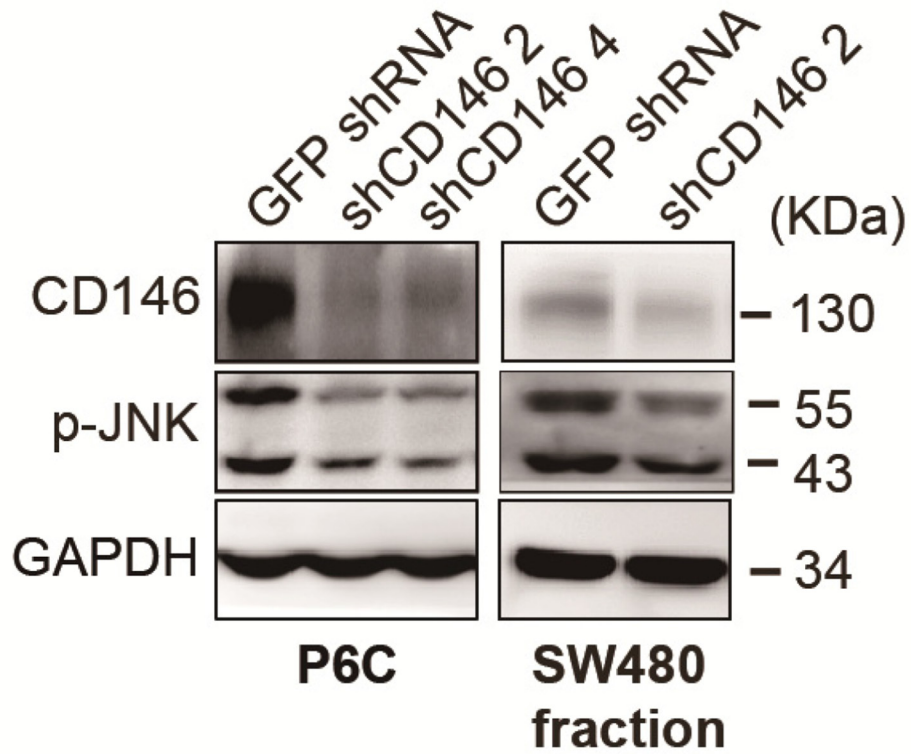

**Supplementary Figure S8: Knockdown of CD146 inactivates non-canonical Wnt/ PCP pathway.** JNK kinase activity was determined by western blotting in P6C cells and SW480 fraction.



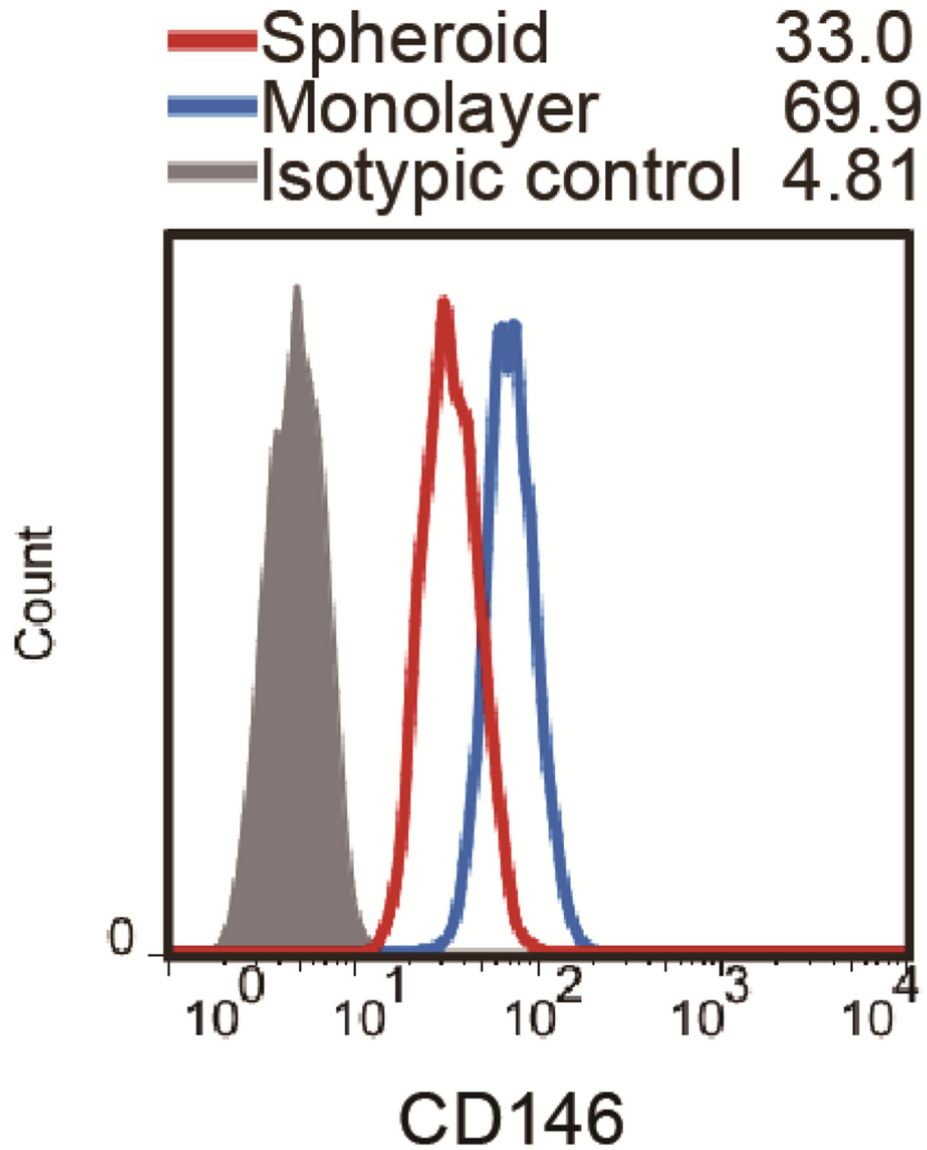

**Supplementary Figure S9: CD146 is downregulated in spheres compared to the monolayer counterparts.** P6C cells were cultured as adherent monolayer in medium containing 10% FBS. Spheroid cultures of P6C were maintained in ultra low adherent plates under SFM condition. Histograms of one representative experiment are shown.

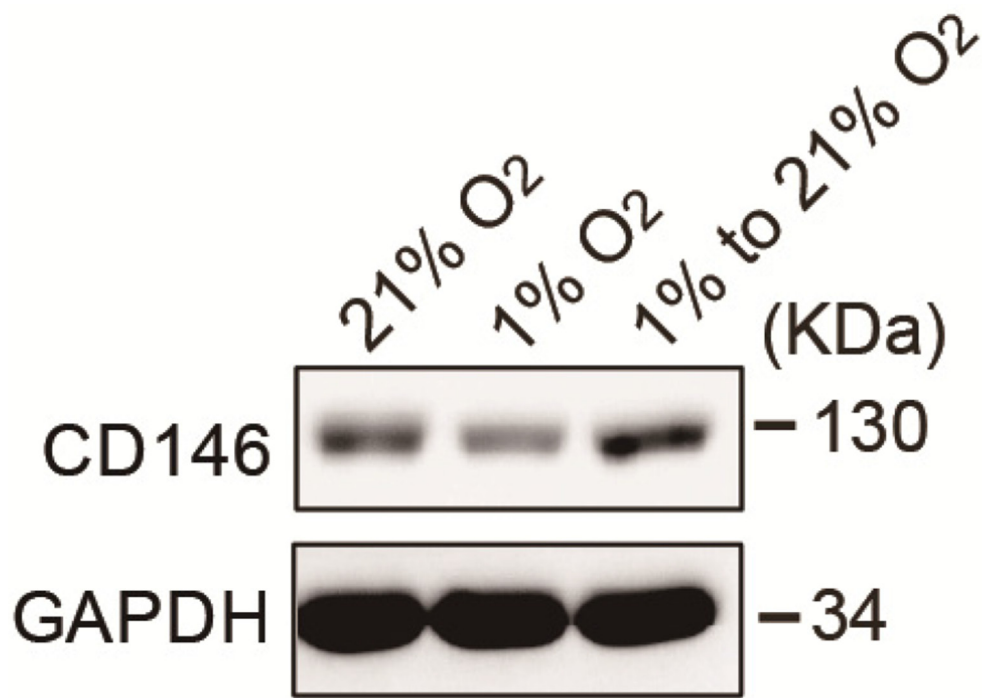

**Supplementary Figure S10: CD146 is downregulated under hypoxic condition.** P6C cells maintained in normoxic condition (21% O<sub>2</sub>) were sub-cultured in hypoxia (1% O<sub>2</sub>) for 24h and were then switched back to the normal condition.

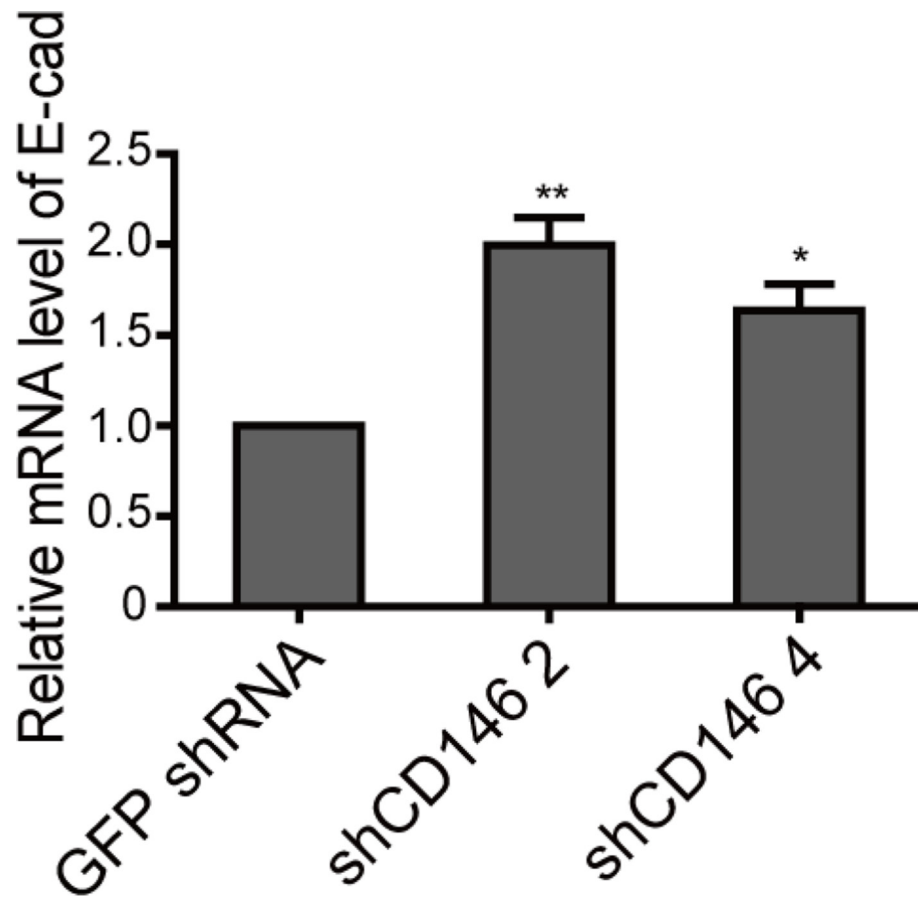

**Supplementary Figure S11: Knockdown of CD146 induces the upregulation of E-cadherin in P6C cells.** Relative mRNA level of E-cadherin was determined by qRT-PCR. \* $P < 0.05$ , \*\* $P < 0.01$ . Error bars, mean  $\pm$  s.d.

**Fig.4C**

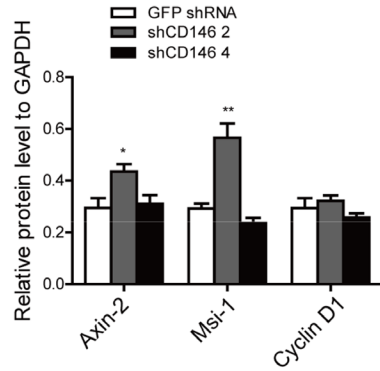

**Fig.4E**

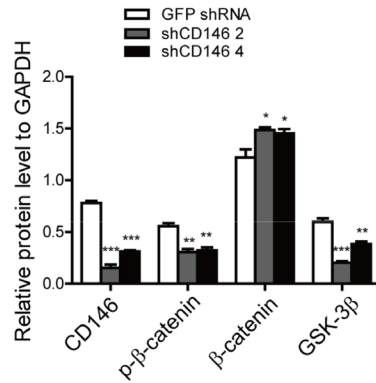

**Fig.4G**

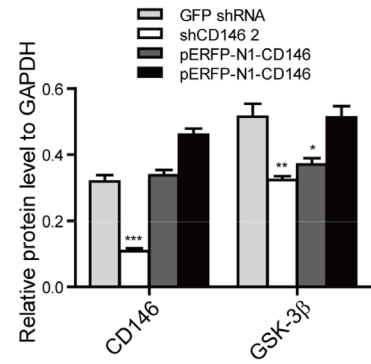

**Fig.4H**

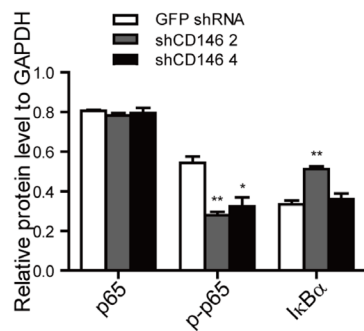

**Fig.4J**

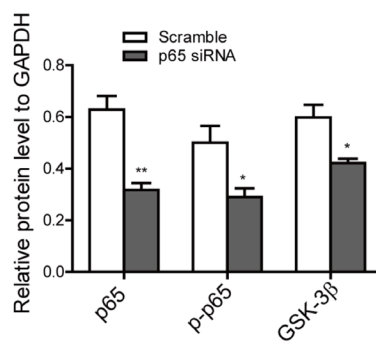

**Fig. 4K**

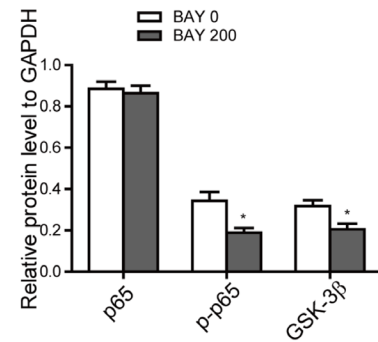

**Fig.S7B**

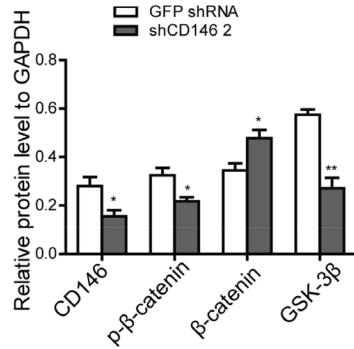

**Fig.S7C**

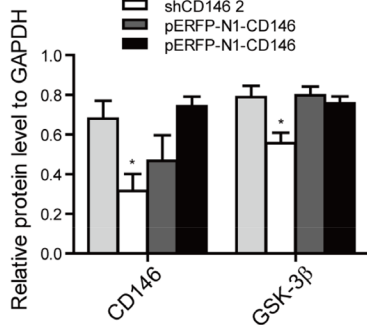

**Fig.S7D**

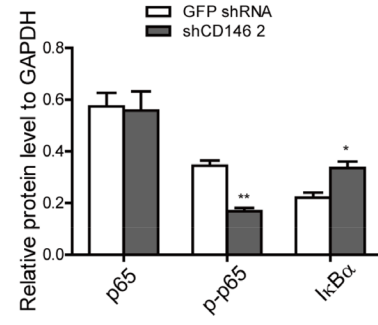

**Fig.S7F**

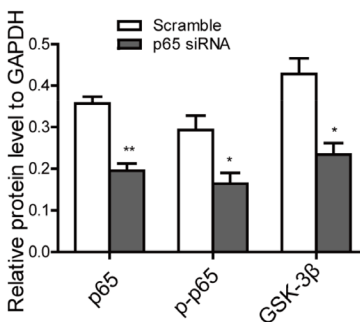

**Fig.S7G**

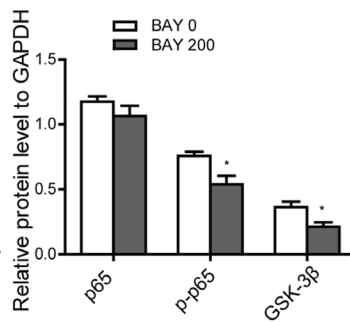

**Fig.S8**

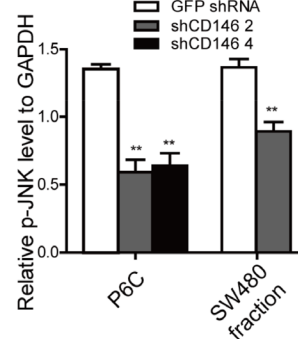

**Fig.S10**

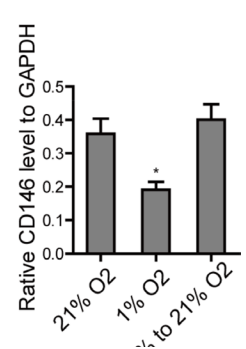

**Supplementary Figure S12: Quantitative analysis of Western blot.** Relative protein expression was determined by measuring the intensities of the bands and then normalizing to the internal control (GAPDH). \* $P < 0.05$ , \*\* $P < 0.01$ , \*\*\* $P < 0.001$ . Error bars, mean  $\pm$  s.d.

Supplementary Table S1: Pathway analysis based on the KEGG database

| Pathway          | Hits | Total | Percent | Enrichment test<br>p-value | q-value |
|------------------|------|-------|---------|----------------------------|---------|
| Wnt              | 20   | 151   | 13.25%  | 0.1627                     | 0.7036  |
| Notch            | 8    | 47    | 17.02%  | 0.1315                     | 0.7036  |
| Hedgehog         | 7    | 56    | 12.50%  | 0.3631                     | 0.7055  |
| ABC transporters | 6    | 44    | 13.64%  | 0.314                      | 0.7055  |

Hit threshold: fold change of gene expression  $\geq 2$

Supplementary Table S2: Differentially expressed genes in P6C cells upon CD146 knockdown

| Gene Symbol   | Accession Number | Probe ID    | Fold Change               |                           |
|---------------|------------------|-------------|---------------------------|---------------------------|
|               |                  |             | shCD146 2 vs GFP<br>shRNA | shCD146 4 vs GFP<br>shRNA |
| <i>LEF1</i>   | NM_001130714     | 221558_s_at | 1.31                      | 1.43                      |
| <i>HNF1A</i>  | NM_002127        | 210515_at   | 1.63                      | 1.51                      |
| <i>CCND1</i>  | NM_053056        | 208712_at   | 1.35                      | 0.81                      |
| <i>AXIN2</i>  | NM_004655        | 222696_at   | 2.52                      | 2.2                       |
| <i>CD44</i>   | NM_000610        | 212063_at   | 1.14                      | 1.36                      |
| <i>BIRC5</i>  | NM_001012270     | 202094_at   | 0.93                      | 0.66                      |
| <i>ASCL2</i>  | NM_005170        | 207607_at   | 0.72                      | 0.79                      |
| <i>MSI1</i>   | NM_002442        | 206333_at   | 7.81                      | 5.41                      |
| <i>SOX9</i>   | NM_000346        | 202935_s_at | 0.74                      | 3.25                      |
| <i>SOX2</i>   | NM_003106        | 213722_at   | 2.3                       | 3.24                      |
| <i>NANOG</i>  | NM_024865        | 220184_at   | 19.84                     | 3.24                      |
| <i>POU5F1</i> | NM_002701        | 208286_x_at | 1.7                       | 0.78                      |
| <i>WNT9A</i>  | NM_003395        | 230643_at   | 2.3                       | 2.36                      |
| <i>TWIST1</i> | NM_000474        | 213943_at   | 5.66                      | 1.35                      |
| <i>EGFR</i>   | NM_005228        | 224999_at   | 0.97                      | 0.89                      |
| <i>FZD7</i>   | NM_003507        | 203705_s_at | 3.01                      | 1                         |
| <i>EPCAM</i>  | NM_002354        | 201839_s_at | 2.07                      | 2.54                      |
| <i>MYC</i>    | NM_002467        | 244089_at   | 1.05                      | 1.98                      |
| <i>NMYC</i>   | NM_005378        | 209757_s_at | 23.09                     | 47.22                     |
| <i>JUN</i>    | NM_002228        | 201464_x_at | 0.66                      | 0.65                      |
| <i>FGF9</i>   | NM_002010        | 206404_at   | 2.89                      | 0.7                       |
| <i>JAG1</i>   | NM_000214        | 209097_s_at | 0.74                      | 2.28                      |
| <i>CDH1</i>   | NM_004360        | 201130_s_at | 1.69                      | 0.42                      |
| <i>ABCBI</i>  | NM_000927        | 243951_at   | 2.63                      | 1.77                      |
| <i>RUNX2</i>  | NM_001015051     | 232231_at   | 1.32                      | 4.78                      |
| <i>CTNNB1</i> | NM_001098209     | 201533_at   | 1.39                      | 1.05                      |
| <i>GSK3B</i>  | NM_001146156     | 209945_s_at | 0.45                      | 0.89                      |
| <i>GSK3A</i>  | NM_019884        | 632_at      | 0.97                      | 1.06                      |
| <i>CREBBP</i> | NM_001079846     | 228177_at   | 3.4                       | 1.45                      |
| <i>FZD1</i>   | NM_003505        | 204451_at   | 6.02                      | 1.9                       |
| <i>FZD3</i>   | NM_017412        | 227524_at   | 2.62                      | 6.56                      |
| <i>FZD8</i>   | NM_031866        | 224325_at   | 1.14                      | 2.26                      |
| <i>LRP5</i>   | NM_002335        | 209468_at   | 1.86                      | 2.39                      |
| <i>SFRP1</i>  | NM_003012        | 202035_s_at | 0.48                      | 0.32                      |
| <i>DKK1</i>   | NM_012242        | 204602_at   | 0.45                      | 0.98                      |
| <i>MCAM</i>   | NM_006500        | 209087_x_at | 0.14                      | 0.23                      |

**Supplementary Table S3: shRNA used in CD146 knockdown**

| <b>Name</b> | <b>Sequences</b>    | <b>Respective cDNA locations</b> |
|-------------|---------------------|----------------------------------|
| GFP shRNA   | non-effective shRNA | nonsense sequence                |
| shCD146 1   | ATTCCTCAAGTCATCTGGT | 506~524bp (190~196aa)            |
| shCD146 2   | GTTGAATCTGTCTTGTGAA | 1299~1318bp (454~460aa)          |
| shCD146 3   | TGGCATTCAAGGAGAGGAA | 1342~1360bp (468~474aa)          |
| shCD146 4   | GCTGGTTAAAGAAGACAAA | 634~652bp(231~237aa)             |

Supplementary Table S4: Primers used in qRT-PCR

| Gene                                   | Sequences(5'-3')                                            |
|----------------------------------------|-------------------------------------------------------------|
| <i>MCAM</i><br>( <i>CD146</i> )        | Forward: TCAACGGCACGGCAAGTG<br>Reverse: AGGCCGTGCATTCAACACC |
| <i>CD44s</i>                           | TCATAGAAGGGCACGTGGTG<br>TGGGAGGTGTTGGATGTGAG                |
| <i>CD133</i>                           | CTATTCAGGATATACTCTCAGCATT<br>TTTCTGTGGATGTAACCTTCAGTG       |
| <i>CD166</i>                           | CGT CTG CTC TTC TGC CTC TT<br>TAG GTG CCT CAA ACA CGT TG    |
| <i>EpCAM</i>                           | CGCAGCTCAGGAAGAATGTG<br>TGAAGTACTGTCATTGACG                 |
| <i>ITGB1</i><br>( <i>Integrin β1</i> ) | TTCAGTGAATGGCAACAATG<br>AGCAACCACGCCTGCTAC                  |
| <i>POU5F1</i><br>( <i>Oct-4</i> )      | TTTAATCCCACATCATGTATCACT<br>CTATCTACTGTGTCCCAGG             |
| <i>SOX2</i>                            | GTATCAGGAGTTGTCAAGGCAGAG<br>TCCTAGTCTTAAAGAGGCAGCAAAC       |
| <i>NANOG</i>                           | CGATCTCCTGACCTTGT<br>CACGCCTGTAAATCCCA                      |
| <i>MYC</i><br>( <i>c-Myc</i> )         | CGGAACTCTTGTGCGTAAGG<br>CTCAGCCAAGGTTGTGAGGT                |
| <i>BMI1</i>                            | TTCGACCTTTGCAGATACCCATAAC<br>TGCCAATTGCTTCTAATGGAACAG       |
| <i>AXIN2</i>                           | AGTGTGAGGTCCACGGAAAC<br>CTGGTGCAAAGACATAGCCA                |
| <i>MSH1</i>                            | GGTTTCCAAGCCACAACCTA<br>TCGGGGAAGTGGTAGGTGTA                |
| <i>CCND1</i><br>( <i>Cyclin D1</i> )   | CTGGAGGTCTGCGAGGAACA<br>CCTTCATCTTAGAGGCCACGAA              |
| <i>HNF1A</i><br>( <i>TCF1</i> )        | AGGAGTGCAATAGGGCGGAATG<br>CCGGTTGGCAAACCAGTTGTAG            |
| <i>LEF1</i>                            | CGAAGAGGAAGGCGATTTAG<br>CTGAGAGGTTTGTGCTTGTC                |
| <i>TWIST1</i>                          | TGCCAATCAGCCACTGAAAG<br>TTTGCAGGCCAGTTTGATCCC               |
| <i>SOX9</i>                            | TGGGCAAGCTCTGGAGACTTC<br>ATCCGGGTGGTCCTTCTTGTC              |
| <i>BIRC5</i><br>( <i>Survivin</i> )    | AGAACTGGCCCTTCTTGAGG<br>CTTTTTATGTTCCCTATGGGGTC             |
| <i>WNT9A</i>                           | GCAAGATGCTGGATGGGTC<br>GAGGATGGTCAGGGGCTC                   |
| <i>E-cadherin</i>                      | TGCCCAGAAAATGAAAAAGG<br>GTGTATGTGGCAATGCGTTC                |
| <i>GAPDH</i>                           | CAGCCTCAAGATCATCAGCA<br>GTCTTCTGGTGGCAGTGAT                 |



Supplementary Table S5: Primers used in ChIP assays

| primers | Sequences(5'-3')                              |
|---------|-----------------------------------------------|
| Pair 1  | TTCGCTTTCTTCTCCCCACC<br>GATTGGCTGGAAAACCTCCGC |
| Pair 2  | CGCTTTCTTCTCCCCACCTT<br>ATTGGCTGGAAAACCTCCGCT |
| Pair 3  | TCGCTTTCTTCTCCCCACCT<br>TTGGCTGGAAAACCTCCGCT  |
